# Supplementary material for: Genome-wide DNA methylation profiling with MeDIP-seq using archived dried blood spots
Source: PubMed Central journal article supplement (PMC4960904; doi:10.1186/s13148-016-0242-1), 2016-07-26
Supplement: 13148_2016_242_MOESM1_ESM.pdf [file 13148_2016_242_MOESM1_ESM.pdf]

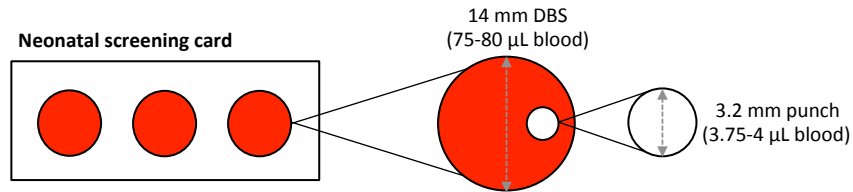

| Method         | Coverage     | Min. DNA requirement                             | Part of DBS |
|----------------|--------------|--------------------------------------------------|-------------|
| WGBS-seq       | Whole-genome | 5 $\mu$ g                                        | 2.5/1       |
| MeDIP-seq      | Whole-genome | 0.05 $\mu$ g                                     | 1/40        |
| MBD-seq        | Whole-genome | 1 $\mu$ g                                        | 1/2         |
| RRBS-seq       | Genome-wide  | 0.01 $\mu$ g                                     | 1/200       |
| MRE-seq        | Genome-wide  | 0.5 $\mu$ g                                      | 1/4         |
| 450K array     | Genome-wide  | 0.02 $\mu$ g                                     | 1/100       |
| Epityper       | Candidate    | 0.025 $\mu$ g / amplicon<br>(multiple CpG sites) | 1/80        |
| iPlex          | Candidate    | 0.1 $\mu$ g / plex<br>(~10 CpG sites)            | 1/20        |
| Pyrosequencing | Candidate    | 0.01 $\mu$ g / amplicon<br>(multiple CpG sites)  | 1/200       |
