# Supplementary material for: Genome-wide DNA methylation profiling with MeDIP-seq using archived dried blood spots
Source: PubMed Central journal article supplement (PMC4960904; doi:10.1186/s13148-016-0242-1), 2016-07-26
Supplement: 13148_2016_242_MOESM4_ESM.pdf [file 13148_2016_242_MOESM4_ESM.pdf]

| Sample ID | Total Reads nt | %Q20<br>before Filter | %Q20<br>after Filter | %GC<br>before Filter | %GC<br>after Filter | Filter Adapter | Filter N | Filter Low<br>Quality | Clean Reads nt |
|-----------|----------------|-----------------------|----------------------|----------------------|---------------------|----------------|----------|-----------------------|----------------|
| hDBS      | 7.01G          | 96.85%                | 97.78%               | 44.70%               | 44.74%              | 0.14%          | 0.32%    | 1.87%                 | 6.85G          |
| rDBS      | 6.45G          | 96.94%                | 97.82%               | 46.51%               | 46.54%              | 0.13%          | 0.32%    | 1.76%                 | 6.31G          |
| oDBS      | 7.16G          | 97.12%                | 97.87%               | 45.92%               | 45.93%              | 0.21%          | 0.32%    | 1.37%                 | 7.03G          |
