# Supplementary material for: Genome-wide DNA methylation profiling with MeDIP-seq using archived dried blood spots
Source: PubMed Central journal article supplement (PMC4960904; doi:10.1186/s13148-016-0242-1), 2016-07-26

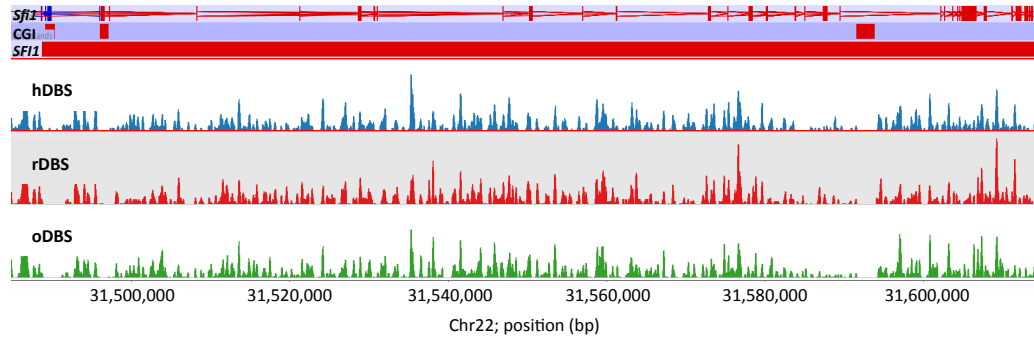

Supplement: 13148_2016_242_MOESM7_ESM.pdf [file 13148_2016_242_MOESM7_ESM.pdf]
